# Supplementary material
Source: PubMed Central journal article supplement (PMC9980558)
Supplement: Supplementary_Digital_Material1.pdf [file Supplementary_Digital_Material1.pdf]

SUPPLEMENTARY DIGITAL MATERIAL 1

Supplementary Table I.—Characteristics and outcomes of studies included in the systematic review.

| Authors<br>Years | Study<br>design;<br>Evidence<br>levels | Characteristics of patients                           | Symptoms                                              | Diagnostic tools                                                                                                  | Therapeutic approaches                                               | Duration of treatment                   | Follow up              | Results                                                                                                              | Risk of bias |
|------------------|----------------------------------------|-------------------------------------------------------|-------------------------------------------------------|-------------------------------------------------------------------------------------------------------------------|----------------------------------------------------------------------|-----------------------------------------|------------------------|----------------------------------------------------------------------------------------------------------------------|--------------|
| Canbaz<br>2017   | Retrospective study;<br>Level 2        | 21 pt,<br>5 males and<br>16 female pt;<br>42.7±6.9 y  | Urge<br>incontinence,<br>urgency,<br>and<br>frequency | Frequency,<br>nocturia,<br>urgency,<br>urge<br>incontinence,<br>voided<br>volume.<br>OAB-q,<br>OAB-V8,<br>ICIQ-SF | Percutaneous<br>Posterior Tibial<br>Nerve<br>Stimulation<br>(PTNS)   | 12<br>consecutive<br>weekly<br>sessions | 3-6-9 and<br>12 months | Frequency,<br>incontinence,<br>urgency<br>episodes, and<br>nocturia<br>decreased daily.<br>Voided volume<br>improved | High<br>risk |
| De Seze<br>2011  | Prospective<br>study;<br>Level 2       | 70 patients,<br>51 women<br>and 19 men<br>48.3±10.2 y | Symptoms<br>of an<br>overactive<br>bladder            | QOL,<br>urgency,<br>frequency,<br>maximum<br>cystometric<br>capacity,                                             | Transcutaneous<br>posterior tibial<br>nerve<br>stimulation<br>(PTNS) | Daily sessions<br>of 20 min             | 3 months               | Clinical<br>improvement of<br>symptoms of<br>the patients                                                            | Low<br>risk  |

|                  |                                  |                                                                                            |                                                                      |                                                                                                                                                                        |                                                                                                                      |                                      |                                                                                       |                                                                                                        |                 |
|------------------|----------------------------------|--------------------------------------------------------------------------------------------|----------------------------------------------------------------------|------------------------------------------------------------------------------------------------------------------------------------------------------------------------|----------------------------------------------------------------------------------------------------------------------|--------------------------------------|---------------------------------------------------------------------------------------|--------------------------------------------------------------------------------------------------------|-----------------|
|                  |                                  |                                                                                            |                                                                      | reflex<br>volume                                                                                                                                                       |                                                                                                                      |                                      |                                                                                       |                                                                                                        |                 |
| Engeler<br>2015  | Prospective<br>study;<br>Level 2 | 17 pt,<br>13 female pt,<br>4 male pt.<br>46.2 (range<br>16.9-74.6 y)                       | Refractory<br>neurogenic<br>lower<br>urinary<br>tract<br>dysfunction | Voided<br>volume, post<br>void residual,<br>frequency,<br>incontinence                                                                                                 | Sacral<br>neuromodulation                                                                                            | Implantation<br>of<br>neuromodulator | Assessment<br>after 6<br>months<br>and then<br>each year.<br>24<br>months, 6<br>years | Chronic sacral<br>neuromodulation<br>is effective<br>and safe                                          | Unclear<br>risk |
| Ferreira<br>2019 | Clinical<br>trial;<br>Level 1    | Group A: 15<br>females pt,<br>38.6 ± 13.5 y<br>Group B: 15<br>females pt,<br>49.8 ± 16.5 y | Urinary<br>incontinence                                              | EDSS,<br>perineal<br>sensitivity;<br>OAB-q,<br>Cutaneous<br>anal reflex;<br>Genital<br>dystopia;<br>voluntary<br>contraction;<br>Stress test<br>with loss of<br>urine, | Group A:<br>Traditional<br>exercises +<br>intravaginal<br>electrostimulation<br>Group B:<br>Traditional<br>exercises | Twice a week<br>for 6 months         | 6 months                                                                              | Rehabilitation<br>plus<br>electrostimulation<br>engendered<br>better results<br>than exercise<br>alone | Low<br>risk     |

|               |                            |                                                  |                                                 |                                                                       |                                                        |                                     |                  |                                                                        |          |
|---------------|----------------------------|--------------------------------------------------|-------------------------------------------------|-----------------------------------------------------------------------|--------------------------------------------------------|-------------------------------------|------------------|------------------------------------------------------------------------|----------|
|               |                            |                                                  |                                                 | Qualiveen questionnaire ; PERFECT                                     |                                                        |                                     |                  |                                                                        |          |
| Fjorback 2007 | Prospective study; Level 2 | 12 pt, 7 men, 5 females pt 46 y (range: 32–63 y) | Symptoms of Detrusor Overactivity               | Bladder volume at first contraction and maximum detrusor pressure     | Posterior Tibial Nerve Stimulation (PTNS)              | Acute assessment                    | Acute assessment | Electrical stimulation of posterior tibial nerve has no acute effects. | Low risk |
| Gobbi 2011    | Prospective study; Level 2 | 18 pt, 2 male, 16 female pt 46,6±13 y            | Symptoms of detrusor overactivity , dyssynergia | EDSS, frequency, nocturia, urgency, voided volume, residual, QoL, VAS | Percutaneous posterior tibial nerve Stimulation (PTNS) | 30 min, once a week for 12 sessions | 3 months         | PTNS is effective, safe and well-tolerated                             | Low risk |
| Kabay, 2008   | Prospective study; Level 2 | 29 pt, 12 male, 17 female pt 46.5±8.5 y          | Urge incontinence, urgency,                     | EDSS, cystometry capacity                                             | Percutaneous posterior tibial nerve                    | -                                   | -                | PTNS is effective to suppress detrusor                                 | Low risk |

|            |                             |                                                                  |                                                                                          |                                                                               |                                                                                                                         |                                                                               |           |                                                                               |          |
|------------|-----------------------------|------------------------------------------------------------------|------------------------------------------------------------------------------------------|-------------------------------------------------------------------------------|-------------------------------------------------------------------------------------------------------------------------|-------------------------------------------------------------------------------|-----------|-------------------------------------------------------------------------------|----------|
|            |                             |                                                                  | and frequency                                                                            |                                                                               | stimulation (PTNS)                                                                                                      |                                                                               |           | overactivity in MS patients                                                   |          |
| Kabay 2009 | Prospective study; Levels 2 | 19 pt, 6 male, 13 female pt<br>44.9 ± 8,3 y                      | Symptoms of neurogenic detrusor overactivity                                             | Voided volume, detrusor contraction, pressure and capacity, maximal flow rate | Percutaneous Posterior Tibial Nerve Stimulation (PTNS)                                                                  | 30 min once a week for 3 months                                               | 3 months  | PTNS results in prominent improvements on the clinical and urodynamic outcome | Low risk |
| Khan 2010  | Clinical trials; Levels 1   | 58 pt<br>Group A: 24 pt<br>Group B 34<br>Control<br>49.9 ± 8.6 y | Detrusor overactivity, sphincter dyssynergia, poor bladder compliance, urinary retention | EDSS, IIQ, QOL                                                                | Treatment group received personalized, multidisciplinary rehabilitation program. Control group maintenance program only | 2-3 session/week for 6 weeks. Continue with maintenance program for 12 months | 12 months | The treatment group compared with the control group showed improvement in IIQ | Low risk |
| Lucio 2010 | Clinical trials; Levels 1   | 27 pt,<br>Group A 13 pt                                          | Frequency, urgency, urge                                                                 | PERFECT, EDSS, capacity,                                                      | Pelvic Floor Muscle                                                                                                     | Twice a week for 12 weeks                                                     | 3 months  | PFMT is an effective approach                                                 | Low risk |

|            |                          |                                                                              |                                                                                                 |                                                         |                                                                                                                         |                                             |          |                                                                                                           |          |
|------------|--------------------------|------------------------------------------------------------------------------|-------------------------------------------------------------------------------------------------|---------------------------------------------------------|-------------------------------------------------------------------------------------------------------------------------|---------------------------------------------|----------|-----------------------------------------------------------------------------------------------------------|----------|
|            |                          | Control group 14 pt<br>34.7±8.8 y                                            | urinary incontinence, nocturnal enuresis, nocturia, hesitancy, slow stream, incomplete emptying | compliance, maximal flow rate, frequency, voided volume | Training (PFMT)                                                                                                         |                                             |          |                                                                                                           |          |
| Lucio 2011 | Clinical trial; Levels 1 | Group A: 18 female pt<br>Group B: 17 female controls<br>35 y (range 20-49 y) | Overactive bladder symptoms                                                                     | ICIQ-SF, QoL, EDSS, OAB-V8, PERFECT                     | Pelvic floor muscle training (PFMT) with home exercises, <i>versus</i> perineometer inside the vagina with no exercise. | Twice / week for 30 min for 12 weeks        | 3 months | There was improvement in the QoL and reduction of overactive bladder symptoms for women who did the PFMT. | Low risk |
| Lucio 2014 | Clinical trial; Levels 1 | 30 pt<br>Group A: 10<br>Group B: 10<br>Group C: 10                           | Lower urinary tract symptoms                                                                    | PFM function, PFM tone, FSFI                            | Group A: PFMT+ EMG biofeedback<br>Group B:                                                                              | 30 min of treatment sessions twice per week | 3 months | PFMT alone or in combination with NMES or TTNS                                                            | Low risk |

|              |                           |                                                                                     |                              |                                                                                                                                  |                                                                                                                           |                                             |             |                                                                                                     |          |
|--------------|---------------------------|-------------------------------------------------------------------------------------|------------------------------|----------------------------------------------------------------------------------------------------------------------------------|---------------------------------------------------------------------------------------------------------------------------|---------------------------------------------|-------------|-----------------------------------------------------------------------------------------------------|----------|
|              |                           | 45.5 y (range 27-54 y)                                                              |                              | questionnaire , PERFECT; EDSS, VAS                                                                                               | PFMT+ EMG biofeedback and NMES<br>Group C: PFMT+EMG biofeedback+ PTNS                                                     |                                             |             | contributes to the improvement of arousal, lubrication, satisfaction and improves the score of FSFI |          |
| Lucio 2016   | Clinical trial; Level 1   | 30 female pt<br>Group A: 10<br>Group B: 10<br>Group C: 10<br>43.5 y (range 42-52 y) | Lower urinary tract symptoms | 24-hour pad test, 3-day bladder diary, strength and muscle tone, urodynamic studies, EDSS, OAB-V8, ICIQ-SF, Qualiveen instrument | Group A: PFMT + EMG biofeedback + NMES<br>Group B: PFMT + EMG biofeedback +NMES<br>Group C: PFMT + EMG biofeedback + PTNS | 50-minute treatment sessions twice per week | 3 months    | PFMT alone or in combination with NMES or TTNS is effective                                         | Low risk |
| McClurg 2006 | Clinical trial; Levels 2) | 30 female pt<br>50,5 y (range 33-67 y)                                              | Urinary symptoms             | EMG, 3-day Voiding Diary, 24-                                                                                                    | Group 1: PFTA                                                                                                             | Stimulation at clinic                       | 0, 9 weeks; | Group 3 demonstrated superior benefit                                                               | Low risk |

|                    |                          |                                                                                 |                                             |                                                                                                                                                             |                                                                        |                                                                                 |                            |                                                                                                                                                                 |          |
|--------------------|--------------------------|---------------------------------------------------------------------------------|---------------------------------------------|-------------------------------------------------------------------------------------------------------------------------------------------------------------|------------------------------------------------------------------------|---------------------------------------------------------------------------------|----------------------------|-----------------------------------------------------------------------------------------------------------------------------------------------------------------|----------|
|                    |                          |                                                                                 |                                             | hour Pad-Test, Uroflowmetry, IIQ, UDI, KHQ, MSQoL54                                                                                                         | Group 2: PFTA+EMG Biofeedback;<br>Group 3: PFTA +EMG Biofeedback +NMES | (weekly) was initially for 5 min, increasing to a maximum of 30 min for 9 weeks | 4, 6 months                | in the number of leaks and pad test than Group 2, with Group 1 showing less improvement when compared to week 0                                                 |          |
| McClurg, Ashe 2008 | Clinical trial; Levels 1 | 74 pt, Group A 37 pt, 26 female, 11 male<br>Group B 37 pt, 31 female, 6 male pt | Symptoms of lower urinary tract dysfunction | Incontinence Impact Questionnaire, Urinary distress inventory, he International Prostate Symptom Score, VAS, Multiple Sclerosis Impact Scale, Barthel index | Neuromuscular Electrical Stimulation                                   | 9 weeks                                                                         | 0, 9 weeks;<br>4, 6 months | Active Neuromuscular Electrical Stimulation, Pelvic Floor Muscle Training and EMG Biofeedback could alleviate symptoms of lower urinary tract Dysfunction in MS | Low risk |

|                            |                          |                                                                             |                                                          |                                                                                        |                                                                         |                                                    |                    |                                                                                                                                                            |           |
|----------------------------|--------------------------|-----------------------------------------------------------------------------|----------------------------------------------------------|----------------------------------------------------------------------------------------|-------------------------------------------------------------------------|----------------------------------------------------|--------------------|------------------------------------------------------------------------------------------------------------------------------------------------------------|-----------|
| McClurg, Lowe-Stronge 2008 | Clinical trial; Levels 1 | 37 pt, 11 male, 26 female pt<br>52.0±8.8 y                                  | Lower urinary tract dysfunction                          | Bladder diary, pad test, uroflowmetry, International Prostate Symptom Score; VAS       | PFMT and EMG biofeedback                                                | 9 weeks                                            | 9, 16, 24 weeks    | 9-week PFMT program improved the function of PFM, reduced the symptoms associated with lower urinary tract dysfunction and increased QoL in people with MS | Low risk  |
| McClurg 2009               | Clinical trial; Level 1  | Group A: 37 pt<br>Group B: 37 controls<br>11 male pt, 26 female pt<br>>18 y | Symptoms associated with lower urinary tract dysfunction | Leakage of episode per day, symptoms questionnaire, pelvic floor muscle function using | Group A: PFMT + vaginal or anal electrical stimulation<br>Group B: PFMT | EMG biofeedback at weekly clinic visit for 9 weeks | 9,16, and 24 weeks | At 9 weeks, group A had significantly less incontinence, and lighter pads than group B. At 24 weeks, pad weights were the only                             | High risk |



|                 |                                |                                                   |                                                         |                                                    |                                               |                                                                          |                           |                                                                                                                                                                      |             |
|-----------------|--------------------------------|---------------------------------------------------|---------------------------------------------------------|----------------------------------------------------|-----------------------------------------------|--------------------------------------------------------------------------|---------------------------|----------------------------------------------------------------------------------------------------------------------------------------------------------------------|-------------|
|                 |                                |                                                   |                                                         | Oxford, and<br>EMG.                                |                                               |                                                                          |                           | objective<br>outcome that<br>remained<br>statistically<br>significant.                                                                                               |             |
| Rafii<br>2017   | Clinical<br>trial; Levels<br>1 | 50 pt,<br>female pt<br>33 y (range<br>18-50 y)    | Urinary<br>incontinenc<br>e                             | EDSS, ICIQ-<br>SF, DASS-<br>21                     | Pelvic Floor<br>Muscle<br>Training<br>(PFMT)  | Exercises 3<br>times a day<br>for 12<br>consecutive<br>weeks at<br>home. | 1, 2, 3<br>months         | PFMT reduces<br>urinary<br>incontinence,<br>stress, anxiety<br>and depression                                                                                        | Low<br>risk |
| Vahtera<br>1997 | Clinical<br>trial; levels<br>1 | 80 pt, 50<br>female, 30<br>male pt<br>42.4± 9.5 y | Symptoms<br>of lower<br>urinary<br>tract<br>dysfunction | EMG, post<br>voided<br>residual<br>volume,<br>EDSS | Pelvic floor<br>muscle<br>exercises<br>(PFMT) | 3-5 times a<br>week for at<br>least 6 months                             | 3 weeks,<br>2-6<br>months | PFMT<br>combined with<br>electrical<br>stimulation of<br>the pelvic floor<br>constitute an<br>effective<br>treatment for<br>lower urinary<br>tract<br>dysfunction in | Low<br>risk |

|                                      |                            |                                                   |                                                                                           |                                                     |                                              |                                 |           |                                                                                                                                                     |           |
|--------------------------------------|----------------------------|---------------------------------------------------|-------------------------------------------------------------------------------------------|-----------------------------------------------------|----------------------------------------------|---------------------------------|-----------|-----------------------------------------------------------------------------------------------------------------------------------------------------|-----------|
|                                      |                            |                                                   |                                                                                           |                                                     |                                              |                                 |           | male MS patients                                                                                                                                    |           |
| Zecca, Digesu, Robshaw, Puccini 2014 | Prospective study; Level 2 | 83 pt, 21 male, 62 female pt 49 y (range 22-72 y) | Symptoms of detrusor overactivity, detrusor sphincter dyssynergia, detrusor underactivity | 3-day bladder diary, PPBC, PPIUS, KHQ, OAB-q        | Percutaneous tibial nerve stimulation (PTNS) | 30 min once a week for 12 weeks | 3 months  | A sensory response, alone or in combination with a motor response, is better associated with a successful outcome of PTNS than motor response alone | High risk |
| Zecca, Digesu, Robshaw, Sing 2014    | Prospective study; Level 2 | 83 pt, 21 male, 62 female pt 49 y (range 22-72 y) | Lower urinary tract symptoms                                                              | Bladder diary, post-micturition residual of voiding | Percutaneous tibial nerve stimulation (PTNS) | 30 min once a week for 12 weeks | 24 months | Prolonged PTNS improves lower urinary tract symptoms                                                                                                | High risk |

Patients pt; Years old y; Multiple Sclerosis MS; PERFECT P power, E endurance, R repetitions, F fast contractions, ECT every contraction timed; Overactive Bladder OAB; Electromyography EMG; Pelvic floor muscle PFM; Pelvic floor muscle training PFMT; Neuromuscular electrical stimulation NMES; Transcutaneous posterior tibial nerve stimulation TPTNS; Overactive Bladder Questionnaire OAB-q, Over-Active Bladder

Awareness Tool - 8-item OAB-V8, Incontinence Questionnaire Short Form ICIQ-SF, Quality of Life Questionnaires QoL; Multiple Sclerosis Quality of Life-54 Instrument MSQoL54; Kings Health QoL questionnaire KHQ; Expanded Disability Status Scale EDSS; Incontinence Impact Questionnaire IIQ-7; Female Sexual Function Index FSFI; Urogenital Distress Inventory UDI; King's Health Questionnaire KHQ; Pelvic Floor Training Advice PFTA; Depression, Anxiety and Stress Scale - 21 Items DASS-21; Patient perception of bladder condition PPBC; patient perception of intensity of urgency scale PPIUS.

## References

1. European Multiple Sclerosis Platform: Recommendations on rehabilitation services for persons with multiple sclerosis in Europe. Brussels: EMSP; 2004.
2. Amarenco G, de Sèze M, Ruffion A, Sheikh I. Clinical and urodynamic evaluations of urinary disorders in multiple sclerosis. *Ann Phys Rehabil Med* 2014;57:277-87.
3. Al Dandan HB, Coote S, McClurg D. Prevalence of Lower Urinary Tract Symptoms in People with Multiple Sclerosis: A Systematic Review and Meta-analysis. *Int J MS Care*. 2020;22:91-99.
4. de Sèze M, Ruffion A, Denys P, Joseph PA, Perrouin-Verbe B. The neurogenic bladder in multiple sclerosis: review of the literature and proposal of management guidelines. *Mult Scler*. 2007;13:915-28.
5. Lúcio AC, Perissinoto MC, Natalin RA, Prudente A, Damasceno BP, D'ancona CA. A comparative study of pelvic floor muscle training in women with multiple sclerosis: its impact on lower urinary tract symptoms and quality of life. *Clinics (Sao Paulo)*. 2011;66:1563-8.
6. Gallien P, Gich J, Sánchez-Dalmau BF, Feneberg W. Multidisciplinary management of multiple sclerosis symptoms. *Eur Neurol*. 2014;72:20-5.
7. Di Benedetto P, Finazzi-Agrò E. Conservative management of adult neurogenic lower urinary tract dysfunction. *EJPRM* 2017;53:981-90.
8. Shamseer L, Moher D, Clarke M, Ghersi D, Liberati A, Petticrew M, *et al*. Preferred reporting items for systematic review and meta-analysis protocols (PRISMA-P) 2015: elaboration and explanation. *BMJ*. 2015;2;350:7647.
9. Stroup DF, Berlin JA, Morton SC, Olkin I, Williamson GD, Rennie D, *et al*. Meta-analysis of observational studies in epidemiology: a proposal for reporting. Meta-analysis of observational studies in epidemiology (MOOSE) group. *JAMA*. 2000; 283:2008–12.
10. Methley AM, Campbell S, Chew-Graham C, McNally R, Cheraghi-Sohi S. PICO, PICOS and SPIDER: a comparison study of specificity and sensitivity in three search tools for qualitative systematic reviews. *BMC Health Serv Res*. 2014;14:579.
11. Higgins JPT, Green S. *Cochrane handbook for systematic reviews of interventions*. Oxford: Cochrane Collaboration; 2008.
12. Guyatt G, Oxman AD, Akl EA, Kunz R, Vist G, Brozek J, *et al*. GRADE guidelines: 1. Introduction-GRADE evidence profiles and summary of findings tables. *J Clin Epidemiol*. 2011;64:383-94.

13. Guyatt GH, Oxman AD, Kunz R, Brozek J, Alonso-Coello P, Rind D, *et al.* GRADE guidelines 6. Rating the quality of evidence--imprecision. *J Clin Epidemiol.* 2011;64:1283-93.
14. Guyatt GH, Oxman AD, Vist G, Kunz R, Brozek J, Alonso-Coello P, *et al.* GRADE guidelines: 4. Rating the quality of evidence--study limitations (risk of bias). *J Clin Epidemiol.* 2011;64:407-15.
15. Guyatt GH, Oxman AD, Montori V, Vist G, Kunz R, Brozek J, *et al.* GRADE guidelines: 5. Rating the quality of evidence--publication bias. *J Clin Epidemiol.* 2011;64:1277-82.
16. Guyatt GH, Oxman AD, Kunz R, Woodcock J, Brozek J, Helfand M, *et al.* GRADE Working Group. GRADE guidelines: 8. Rating the quality of evidence--indirectness. *J Clin Epidemiol.* 2011;64:1303-10.
17. Huedo-Medina TB, Sánchez-Meca J, Marín-Martínez F, Botella J. Assessing heterogeneity in meta-analysis: Q statistic or I<sup>2</sup> index? *Psychol Methods.* 2006;11:193-206.
18. DerSimonian R, Kacker R. Random-effects model for meta-analysis of clinical trials: an update. *Contemp Clin Trials.* 2007;28:105-14.
19. Higgins JP, Altman DG, Gøtzsche PC, Jüni P. The Cochrane Collaboration's tool for assessing risk of bias in randomised trials. *Br. Med. J.* 2011; 343: 889–893.
20. Canbaz Kabay S, Kabay S, Mestan E, Cetiner M, Ayas S. Long term sustained therapeutic effects of percutaneous posterior tibial nerve overactive bladder in multiple sclerosis patients: 12-months results. *Neurourol Urodyn.* 2017;36:104-110.
21. Gobbi C, Digesu GA, Khullar V, El Neil S, Caccia G, Zecca C. Percutaneous posterior tibial nerve stimulation as an effective treatment of refractory lower urinary tract symptoms in patients with multiple sclerosis: preliminary data from a multicentre, prospective, open label trial. *Mult Scler* 2011;17:1514-9.
22. Kabay SC, Yucel M, Kabay S. Acute effect of posterior tibial nerve stimulation on neurogenic detrusor overactivity in patients with multiple sclerosis: urodynamic study. *Urology.* 2008; 71:641-5.
23. Kabay S, Kabay SC, Yucel M, Ozden H, Yilmaz Z, Aras O, *et al.* The clinical and urodynamic results of a 3-month percutaneous posterior tibial nerve stimulation treatment in patients with multiple sclerosis-related neurogenic bladder dysfunction. *Neurourol Urodyn.* 2009;28(8):964-8.

24. Zecca C, Digesu GA, Robshaw P, Puccini F, Khullar V, Tubaro A, *et al.* Motor and sensory responses after percutaneous tibial nerve stimulation in multiple sclerosis patients with lower urinary tract symptoms treated in daily practice. *Eur J Neurol.* 2014;21:506-11.
25. Lúcio AC, Campos RM, Perissinotto MC, Miyaoka R, Damasceno BP, D'ancona CA. Pelvic floor muscle training in the treatment of lower urinary tract dysfunction in women with multiple sclerosis. *Neurourol Urodyn.* 2010;29:1410-3.
26. Lúcio A, D'ancona CA, Perissinotto MC, McLean L, Damasceno BP, de Moraes Lopes MH. Pelvic Floor Muscle Training With and Without Electrical Stimulation in the Treatment of Lower Urinary Tract Symptoms in Women With Multiple Sclerosis. *J Wound Ostomy Continence Nurs.* 2016;43:414-9.
27. de Sèze M, Raibaut P, Gallien P, Even-Schneider A, Denys P, Bonniaud V, *et al.* Transcutaneous posterior tibial nerve stimulation for treatment of the overactive bladder syndrome in multiple sclerosis: results of a multicenter prospective study. *Neurourol Urodyn.* 2011;30:306-11.
28. Rafii F, Sajjadi M, Shareinia H, Sarraf P. Pelvic Floor Muscle Training Instruction to Control Urinary Incontinence and its Resulting Stress, Anxiety and Depression in Patients with Multiple Sclerosis. *Jundishapur J Chronic Dis Care.* 2017; 6:37333.
29. Fjorback MV, van Rey FS, van der Pal F, Rijkhoff NJ, Petersen T, Heesakkers JP. Acute urodynamic effects of posterior tibial nerve stimulation on neurogenic detrusor overactivity in patients with MS. *European Urol* 2006;51:464-70
30. Vahtera T, Haaranen M, Viramo-Koskela AL, Ruutiainen J. Pelvic floor rehabilitation is effective in patients with multiple sclerosis. *Clin Rehabil* 1997; 11: 211–219.
31. McClurg D, Ashe RG, Lowe-Strong AS. Neuromuscular electrical stimulation and the treatment of lower urinary tract dysfunction in multiple sclerosis--a double blind, placebo controlled, randomised clinical trial. *Neurourol Urodyn.* 2008;27:231-7.
32. McClurg D, Ashe RG, Marshall K, Lowe-Strong AS. Comparison of pelvic floor muscle training, electromyography biofeedback, and neuromuscular electrical stimulation for bladder dysfunction in people with multiple sclerosis: a randomized pilot study. *Neurourol Urodyn.* 2006;25:337-48.
33. McClurg D, Lowe-Strong A, Ashe RG. The benefits of pelvic floor muscle training in people with multiple sclerosis and lower urinary tract dysfunction. *Neurourology and Urodynamics* 2008;27:231–237 .

34. Ferreira AP, Pegorare AB, Salgado PR, Casafus FS. Impact of a pelvic floor training program among Women with Multiple Sclerosis: A Controlled Clinical Trial. *Am J Phys Med Rehabil.* 2016;95:1-8.
35. McClurg D, Lowe-Strong A, Ashe R. Pelvic floor training for lower urinary tract dysfunction in MS. *Nurs Times.* 2009;105:45-7.
36. Khan F, Pallant JF, Pallant JI, Brand C, Kilpatrick TJ. A randomised controlled trial: outcomes of bladder rehabilitation in persons with multiple sclerosis. *J Neurol Neurosurg Psychiatry.* 2010;81:1033-8.
37. Engeler DS, Meyer D, Abt D, Müller S, Schmid HP. Sacral neuromodulation for the treatment of neurogenic lower urinary tract dysfunction caused by multiple sclerosis: a single-centre prospective series. *BMC Urol.* 2015;23:15:105.
38. Zecca C, Digesu GA, Robshaw P, Singh A, Elneil S, Gobbi C. Maintenance percutaneous posterior nerve stimulation for refractory lower urinary tract symptoms in patients with multiple sclerosis: an open label, multicenter, prospective study. *J Urol.* 2014;191:697-702.
39. Pereira CMA, Castiglione M, Kasawara KT. Effects of physiotherapy treatment for urinary incontinence in patient with multiple sclerosis. *J Phys Ther Sci.* 2017;29:1259-1263.
40. Lúcio AC, D'Ancona CA, Lopes MH, Perissinotto MC, Damasceno BP. The effect of pelvic floor muscle training alone or in combination with electrostimulation in the treatment of sexual dysfunction in women with multiple sclerosis. *Mult Scler.* 2014;20:1761-8.
41. Roe B, Williams K, Palmer M. Bladder training for urinary incontinence in adults. *Cochrane Database Syst Rev* 2000;1308.
42. Subak LL, Quesenberry CP, Posner SF, Cattolica E, Soghikian K. The effect of behavioural therapy on urinary incontinence: a randomized controlled trial. *Obstet Gynecol* 2002; 100: 72–78.
43. Eustice S, Roe B, Paterson J. Prompted voiding for the management of urinary incontinence in adults (Cochrane Review). *Cochrane Database Syst Rev* 2000;(2):2113.
44. Shafik A, Shafik IA. Overactive bladder inhibition in response to pelvic floor muscle exercises. *World J Urol.* 2003;20:374-7.
45. Yamanishi T, Kaga K, Fuse M, Shibata C, Uchiyama T. Neuromodulation for the Treatment of Lower Urinary Tract. *Low Urin Tract Symptoms* 2015;7:121–32.

46. Tracey JM, Stoffel JT. Secondary and tertiary treatments for multiple sclerosis patients with urinary symptoms. *Investig Clin Urol*. 2016;57:377-383.
47. Silva Ferreira AP, de Souza Pegorare ABG, Miotto Junior A, Salgado PR, Medola FO, Christofolletti G. A Controlled Clinical Trial on the Effects of Exercise on Lower Urinary Tract Symptoms in Women With Multiple Sclerosis. *Am J Phys Med Rehabil*. 2019;98:777-782.
48. Andersson KE, Appel R, Cardozo L, Chapple C, Drutz H, Fourcroy J, *et al*. Pharmacological treatment of urinary incontinence. ICS; 2005 [Internet]. Available from: [https://www.ics.org/Publications/ICI\\_3/v2.pdf/chap14.pdf](https://www.ics.org/Publications/ICI_3/v2.pdf/chap14.pdf) [cited 2022, Jan 24].
