# Supplementary material
Source: PubMed Central journal article supplement (PMC9980558)
Supplement: Supplementary_Digital_Material2.pdf [file Supplementary_Digital_Material2.pdf]

SUPPLEMENTARY DIGITAL MATERIAL 2

Supplementary Table II.—Therapeutic strategies and rehabilitation techniques of the current literature.

| Authors, years | Therapeutic strategies                                                                                                                                                                                                                                                                                                                                                                                                                                                                                                                                                                                                 |
|----------------|------------------------------------------------------------------------------------------------------------------------------------------------------------------------------------------------------------------------------------------------------------------------------------------------------------------------------------------------------------------------------------------------------------------------------------------------------------------------------------------------------------------------------------------------------------------------------------------------------------------------|
| Canbaz 2017    | Posterior tibial nerve stimulation was applied unilaterally with 26-gauge stainless steel needles inserted 5 cm cephalad from the medial malleolus and posterior to the edge of the tibia, placing the ground electrode on the ipsilateral extremity. Electrical stimulation was applied unilaterally by using charge-compensated 200 msec pulses with a pulse rate of 20 Hz, as used in previous studies                                                                                                                                                                                                              |
| De Seze 2011   | TPTNS was applied unilaterally with two adhesives electrodes placed above and behind the medial malleolus at the right ankle. Electrical stimulation with charge-compensated 200 $\mu$ sec with a pulse rate of 10 Hz.                                                                                                                                                                                                                                                                                                                                                                                                 |
| Engeler 2015   | The sacral neuromodulator was implanted unilateral in 88%, at sacral foramen S3 (81%), S4 (19%), with an amplitude of 0.58 Volt, impulse width 210 $\mu$ sec, stimulation frequency 14 Hz                                                                                                                                                                                                                                                                                                                                                                                                                              |
| Ferreira 2019  | 3 sets of 8–10 close-to-maximal contractions, in lying down, sitting up and standing positions.<br>Each contraction should be held according to the endurance of the pelvic floor muscles with the participants aiming to hold the muscles for 10 secs.<br>After the exercise protocol, an intravaginal electrode stimulated S2–S4 dermatomes, with a frequency of 2 Hz, positive pulse duration of 1 $\mu$ sec, intensity tolerable by the patient, and therapy time of 30 mins. During electric stimulation, participants were requested to perform 20 fast and 20 slow contractions of the pelvic floor musculature |
| Fjorback 2007  | Electrical stimulation was applied bilaterally by using charge-compensated 200 msec pulses with a pulse rate of 20 Hz                                                                                                                                                                                                                                                                                                                                                                                                                                                                                                  |
| Gobbi 2011     | Electrical stimulation was applied for 30 min, once a week for 12 weeks, by unilateral insertion of a 34-gauge needle electrode at a 60-degree angle, approximately 5 cm cephalad to the medial malleolus and slightly posterior to the tibia. A PTNS surface electrode was placed on the ipsilateral calcaneus                                                                                                                                                                                                                                                                                                        |
| Kabay, 2008    | Electrical stimulation was applied unilaterally from the medial malleolus                                                                                                                                                                                                                                                                                                                                                                                                                                                                                                                                              |

|            |                                                                                                                                                                                                                                                                                                                                                                                                                                                                                                                                                                                                                                                                                                                            |
|------------|----------------------------------------------------------------------------------------------------------------------------------------------------------------------------------------------------------------------------------------------------------------------------------------------------------------------------------------------------------------------------------------------------------------------------------------------------------------------------------------------------------------------------------------------------------------------------------------------------------------------------------------------------------------------------------------------------------------------------|
|            | and posterior to the edge of the tibia by using charge-compensated 200 microsecond pulses with a pulse rate of 20 Hz                                                                                                                                                                                                                                                                                                                                                                                                                                                                                                                                                                                                       |
| Kabay 2009 | PTNS was applied unilaterally with 26-gauge stainless steel needles inserted 5 cm cephalad from the medial malleolus and posterior to the edge of the tibia, placing the ground electrode on the ipsilateral extremity. Electrical stimulation was applied unilaterally by using charge-compensated 200 msec pulses with a pulse rate of 20 Hz, as used in the previous studies. 1.5 times the threshold for evoking plantar flexion of the toes and/or toe fanning.                                                                                                                                                                                                                                                       |
| Khan 2010  | Bladder re-education, behavior management, pelvic floor exercises, strategies for timed and double voiding, intermittent catheterization techniques, use of prophylactic medication (cranberry capsules); and strict bowel program. A continence nurse on the ward reviewed the bladder program daily                                                                                                                                                                                                                                                                                                                                                                                                                      |
| Lucio 2010 | 30 slow pelvic floor muscle contractions and 3 min of fast contractions in supine position with assistance of a perineometer and were given orientation to repeat the same 30 slow contractions and 3 min of fast contractions, learned during the intervention, three times daily at home without assistance of any device, in different positions like sitting and standing                                                                                                                                                                                                                                                                                                                                              |
| Lucio 2011 | The training focused on improving pelvic floor muscle awareness and contraction strength, and the exercises were individualized according to the degree of pelvic floor weakness, the loss of proprioception and the patient's tolerance                                                                                                                                                                                                                                                                                                                                                                                                                                                                                   |
| Lucio 2014 | All participants repeat 30 slow PFM contractions and 30 fast PFM contractions as instructed during the intervention, three times daily at home without the assistance of biofeedback and were advised to practice the exercises in different position such as in sitting, in standing where applicable, and, in particular, when urgency was present. The exercises were reviewed weekly.<br>NMES treatment consisted of placing a pair of surface electrodes over the sacrum and inducing a current with a pulse width of 50 ms administered at a frequency of 2 Hz, and a stimulation time of 2 s with 60 s rest between stimuli for a period of 30 min<br>TTNS: width of 200 $\mu$ s at a frequency of 10 Hz for 30 min |

|                            |                                                                                                                                                                                                                                                                                                                                                                                                                                                                                                                                                                                                                                                                                                                                                                                                                                                          |
|----------------------------|----------------------------------------------------------------------------------------------------------------------------------------------------------------------------------------------------------------------------------------------------------------------------------------------------------------------------------------------------------------------------------------------------------------------------------------------------------------------------------------------------------------------------------------------------------------------------------------------------------------------------------------------------------------------------------------------------------------------------------------------------------------------------------------------------------------------------------------------------------|
| Lucio 2016                 | Patients perform resting 6 seconds, until 3 min had passed. Then they repeat 30 slow PFM contractions and fast PFM contractions 3 times daily at home without biofeedback assistance.                                                                                                                                                                                                                                                                                                                                                                                                                                                                                                                                                                                                                                                                    |
| McClurg 2006               | Contraction held for 3 sec and repeated three times. The participant practice endurance at home holding for 3 sec and relaxing for 6 sec, 3 times consecutively on each occasion; relaxation time was always double the contraction time.<br>EMG biofeedback: pulse rate 40 Hz, pulse width 250 msec, with 5 sec on and 10 sec off<br>NMES 10 Hz, 450 msec, 10 sec on and 3 sec off, at maximum-tolerated intensity                                                                                                                                                                                                                                                                                                                                                                                                                                      |
| McClurg, Ashe 2008         | EMG biofeedback: frequency of 2 Hz, a pulse width of 50 msec, with 2 sec of stimulation and 60 sec of no stimulation, with a ramp of 8 sec. This was introduced at clinic and then used at home with a gradual increase to a daily maximum of 30 min                                                                                                                                                                                                                                                                                                                                                                                                                                                                                                                                                                                                     |
| McClurg, Lowe-Stronge 2008 | holding time of 3 s, with 5 s rest, repeated five times, five times a day. This would have been gradually increased according to the feedback, to holding sub-maximally for 10 s, with a 5-s rest, 5 times, five times a day                                                                                                                                                                                                                                                                                                                                                                                                                                                                                                                                                                                                                             |
| McClurg 2009               | A typical program commenced with a holding time of three seconds with five seconds' rest; this was repeated five times and done five times a day. This could be gradually increased according to the feedback to holding submaximally for 10 seconds with a five-second rest, repeated five times, five times a day                                                                                                                                                                                                                                                                                                                                                                                                                                                                                                                                      |
| Rafii 2017                 | The patients were instructed to stop their flow of urine midstream for three seconds (but not to repeat this exercise too often). Then they were asked to lie in a supine position with their knees bent and to squeeze the same muscles (as they did to stop urination) while they were breathing gently through the mouth and keeping all other pelvic muscles relaxed. They could gradually do the exercises in sitting and standing positions. They start by holding the squeezes for three seconds and resting for five seconds. The goal was to increase the duration of each contraction to 10 seconds and to do 90 - 100 contractions a day (depending on each patient's ability and level of fatigue). The participants had to do the exercises three times a day (the timing was determined by the patients) for 12 consecutive weeks at home. |

|                                            |                                                                                                                                                                                                                                                                                                                                                                                                                                                  |
|--------------------------------------------|--------------------------------------------------------------------------------------------------------------------------------------------------------------------------------------------------------------------------------------------------------------------------------------------------------------------------------------------------------------------------------------------------------------------------------------------------|
| Vahtera 1997                               | EMG feedback: frequency of 2000 Hz and treatment frequencies of 5-10 Hz, 10-50 Hz, and 50 Hz (7 s pulse/25 s pause).<br>A treatment session consisted of 10 min of each frequency followed by 3 min rest.                                                                                                                                                                                                                                        |
| Zecca, Digesu,<br>Robshaw,<br>Puccini 2014 | Electrical stimulation was applied by the unilateral insertion of a 34-gauge needle electrode at a 60-degree angle, approximately 5 cm cephalad to the medial malleolus and slightly posterior to the tibia. A PTNS surface electrode was placed on the ipsilateral calcaneus. 0.5-9 mA was selected using charge compensated 200 microsecond pulses with a pulse rate of 20 Hz based on each subject's foot/plantar motor and sensory responses |
| Zecca, Digesu,<br>Robshaw, Sing<br>2014    | Electrical stimulation was applied for 30 min once a week for 12 weeks, by unilateral insertion of a thin 34-gauge needle electrode at a 60° angle approximately 4–5 cm cephalad to the medial malleolus of the ankle, between the posterior margin of the tibia and the soleus muscle                                                                                                                                                           |

Transcutaneous posterior tibial nerve stimulation TPTNS; Neuromuscular electrical stimulation NMES.

## References

1. European Multiple Sclerosis Platform: Recommendations on rehabilitation services for persons with multiple sclerosis in Europe. Brussels: EMSP; 2004.
2. Amarenco G, de Sèze M, Ruffion A, Sheikh I. Clinical and urodynamic evaluations of urinary disorders in multiple sclerosis. *Ann Phys Rehabil Med* 2014;57:277-87.
3. Al Dandan HB, Coote S, McClurg D. Prevalence of Lower Urinary Tract Symptoms in People with Multiple Sclerosis: A Systematic Review and Meta-analysis. *Int J MS Care*. 2020;22:91-99.
4. de Sèze M, Ruffion A, Denys P, Joseph PA, Perrouin-Verbe B. The neurogenic bladder in multiple sclerosis: review of the literature and proposal of management guidelines. *Mult Scler*. 2007;13:915-28.
5. Lúcio AC, Perissinoto MC, Natalin RA, Prudente A, Damasceno BP, D'ancona CA. A comparative study of pelvic floor muscle training in women with multiple sclerosis: its impact on lower urinary tract symptoms and quality of life. *Clinics (Sao Paulo)*. 2011;66:1563-8.
6. Gallien P, Gich J, Sánchez-Dalmau BF, Feneberg W. Multidisciplinary management of multiple sclerosis symptoms. *Eur Neurol*. 2014;72:20-5.
7. Di Benedetto P, Finazzi-Agrò E. Conservative management of adult neurogenic lower urinary tract dysfunction. *EJPRM* 2017;53:981-90.
8. Shamseer L, Moher D, Clarke M, Ghersi D, Liberati A, Petticrew M, *et al*. Preferred reporting items for systematic review and meta-analysis protocols (PRISMA-P) 2015: elaboration and explanation. *BMJ*. 2015;2;350:7647.
9. Stroup DF, Berlin JA, Morton SC, Olkin I, Williamson GD, Rennie D, *et al*. Meta-analysis of observational studies in epidemiology: a proposal for reporting. Meta-analysis of observational studies in epidemiology (MOOSE) group. *JAMA*. 2000; 283:2008–12.
10. Methley AM, Campbell S, Chew-Graham C, McNally R, Cheraghi-Sohi S. PICO, PICOS and SPIDER: a comparison study of specificity and sensitivity in three search tools for qualitative systematic reviews. *BMC Health Serv Res*. 2014;14:579.
11. Higgins JPT, Green S. *Cochrane handbook for systematic reviews of interventions*. Oxford: Cochrane Collaboration; 2008.
12. Guyatt G, Oxman AD, Akl EA, Kunz R, Vist G, Brozek J, *et al*. GRADE guidelines: 1. Introduction-GRADE evidence profiles and summary of findings tables. *J Clin Epidemiol*. 2011;64:383-94.

13. Guyatt GH, Oxman AD, Kunz R, Brozek J, Alonso-Coello P, Rind D, *et al.* GRADE guidelines 6. Rating the quality of evidence--imprecision. *J Clin Epidemiol.* 2011;64:1283-93.
14. Guyatt GH, Oxman AD, Vist G, Kunz R, Brozek J, Alonso-Coello P, *et al.* GRADE guidelines: 4. Rating the quality of evidence--study limitations (risk of bias). *J Clin Epidemiol.* 2011;64:407-15.
15. Guyatt GH, Oxman AD, Montori V, Vist G, Kunz R, Brozek J, *et al.* GRADE guidelines: 5. Rating the quality of evidence--publication bias. *J Clin Epidemiol.* 2011;64:1277-82.
16. Guyatt GH, Oxman AD, Kunz R, Woodcock J, Brozek J, Helfand M, *et al.* GRADE Working Group. GRADE guidelines: 8. Rating the quality of evidence--indirectness. *J Clin Epidemiol.* 2011;64:1303-10.
17. Huedo-Medina TB, Sánchez-Meca J, Marín-Martínez F, Botella J. Assessing heterogeneity in meta-analysis: Q statistic or I2 index? *Psychol Methods.* 2006;11:193-206.
18. DerSimonian R, Kacker R. Random-effects model for meta-analysis of clinical trials: an update. *Contemp Clin Trials.* 2007;28:105-14.
19. Higgins JP, Altman DG, Gøtzsche PC, Jüni P. The Cochrane Collaboration's tool for assessing risk of bias in randomised trials. *Br. Med. J.* 2011; 343: 889–893.
20. Canbaz Kabay S, Kabay S, Mestan E, Cetiner M, Ayas S. Long term sustained therapeutic effects of percutaneous posterior tibial nerve overactive bladder in multiple sclerosis patients: 12-months results. *Neurourol Urodyn.* 2017;36:104-110.
21. Gobbi C, Digesu GA, Khullar V, El Neil S, Caccia G, Zecca C. Percutaneous posterior tibial nerve stimulation as an effective treatment of refractory lower urinary tract symptoms in patients with multiple sclerosis: preliminary data from a multicentre, prospective, open label trial. *Mult Scler* 2011;17:1514-9.
22. Kabay SC, Yucel M, Kabay S. Acute effect of posterior tibial nerve stimulation on neurogenic detrusor overactivity in patients with multiple sclerosis: urodynamic study. *Urology.* 2008; 71:641-5.
23. Kabay S, Kabay SC, Yucel M, Ozden H, Yilmaz Z, Aras O, *et al.* The clinical and urodynamic results of a 3-month percutaneous posterior tibial nerve stimulation treatment in patients with multiple sclerosis-related neurogenic bladder dysfunction. *Neurourol Urodyn.* 2009;28(8):964-8.

24. Zecca C, Digesu GA, Robshaw P, Puccini F, Khullar V, Tubaro A, *et al.* Motor and sensory responses after percutaneous tibial nerve stimulation in multiple sclerosis patients with lower urinary tract symptoms treated in daily practice. *Eur J Neurol.* 2014;21:506-11.
25. Lúcio AC, Campos RM, Perissinotto MC, Miyaoka R, Damasceno BP, D'ancona CA. Pelvic floor muscle training in the treatment of lower urinary tract dysfunction in women with multiple sclerosis. *Neurourol Urodyn.* 2010;29:1410-3.
26. Lúcio A, D'ancona CA, Perissinotto MC, McLean L, Damasceno BP, de Moraes Lopes MH. Pelvic Floor Muscle Training With and Without Electrical Stimulation in the Treatment of Lower Urinary Tract Symptoms in Women With Multiple Sclerosis. *J Wound Ostomy Continence Nurs.* 2016;43:414-9.
27. de Sèze M, Raibaut P, Gallien P, Even-Schneider A, Denys P, Bonniaud V, *et al.* Transcutaneous posterior tibial nerve stimulation for treatment of the overactive bladder syndrome in multiple sclerosis: results of a multicenter prospective study. *Neurourol Urodyn.* 2011;30:306-11.
28. Rafii F, Sajjadi M, Shareinia H, Sarraf P. Pelvic Floor Muscle Training Instruction to Control Urinary Incontinence and its Resulting Stress, Anxiety and Depression in Patients with Multiple Sclerosis. *Jundishapur J Chronic Dis Care.* 2017; 6:37333.
29. Fjorback MV, van Rey FS, van der Pal F, Rijkhoff NJ, Petersen T, Heesakkers JP. Acute urodynamic effects of posterior tibial nerve stimulation on neurogenic detrusor overactivity in patients with MS. *European Urol* 2006;51:464-70
30. Vahtera T, Haaranen M, Viramo-Koskela AL, Ruutiainen J. Pelvic floor rehabilitation is effective in patients with multiple sclerosis. *Clin Rehabil* 1997; 11: 211–219.
31. McClurg D, Ashe RG, Lowe-Strong AS. Neuromuscular electrical stimulation and the treatment of lower urinary tract dysfunction in multiple sclerosis--a double blind, placebo controlled, randomised clinical trial. *Neurourol Urodyn.* 2008;27:231-7.
32. McClurg D, Ashe RG, Marshall K, Lowe-Strong AS. Comparison of pelvic floor muscle training, electromyography biofeedback, and neuromuscular electrical stimulation for bladder dysfunction in people with multiple sclerosis: a randomized pilot study. *Neurourol Urodyn.* 2006;25:337-48.
33. McClurg D, Lowe-Strong A, Ashe RG. The benefits of pelvic floor muscle training in people with multiple sclerosis and lower urinary tract dysfunction. *Neurourology and Urodynamics* 2008;27:231–237 .

34. Ferreira AP, Pegorare AB, Salgado PR, Casafus FS. Impact of a pelvic floor training program among Women with Multiple Sclerosis: A Controlled Clinical Trial. *Am J Phys Med Rehabil.* 2016;95:1-8.
35. McClurg D, Lowe-Strong A, Ashe R. Pelvic floor training for lower urinary tract dysfunction in MS. *Nurs Times.* 2009;105:45-7.
36. Khan F, Pallant JF, Pallant JI, Brand C, Kilpatrick TJ. A randomised controlled trial: outcomes of bladder rehabilitation in persons with multiple sclerosis. *J Neurol Neurosurg Psychiatry.* 2010;81:1033-8.
37. Engeler DS, Meyer D, Abt D, Müller S, Schmid HP. Sacral neuromodulation for the treatment of neurogenic lower urinary tract dysfunction caused by multiple sclerosis: a single-centre prospective series. *BMC Urol.* 2015;23:15:105.
38. Zecca C, Digesu GA, Robshaw P, Singh A, Elneil S, Gobbi C. Maintenance percutaneous posterior nerve stimulation for refractory lower urinary tract symptoms in patients with multiple sclerosis: an open label, multicenter, prospective study. *J Urol.* 2014;191:697-702.
39. Pereira CMA, Castiglione M, Kasawara KT. Effects of physiotherapy treatment for urinary incontinence in patient with multiple sclerosis. *J Phys Ther Sci.* 2017;29:1259-1263.
40. Lúcio AC, D'Ancona CA, Lopes MH, Perissinotto MC, Damasceno BP. The effect of pelvic floor muscle training alone or in combination with electrostimulation in the treatment of sexual dysfunction in women with multiple sclerosis. *Mult Scler.* 2014;20:1761-8.
41. Roe B, Williams K, Palmer M. Bladder training for urinary incontinence in adults. *Cochrane Database Syst Rev* 2000;1308.
42. Subak LL, Quesenberry CP, Posner SF, Cattolica E, Soghikian K. The effect of behavioural therapy on urinary incontinence: a randomized controlled trial. *Obstet Gynecol* 2002; 100: 72–78.
43. Eustice S, Roe B, Paterson J. Prompted voiding for the management of urinary incontinence in adults (Cochrane Review). *Cochrane Database Syst Rev* 2000;(2):2113.
44. Shafik A, Shafik IA. Overactive bladder inhibition in response to pelvic floor muscle exercises. *World J Urol.* 2003;20:374-7.
45. Yamanishi T, Kaga K, Fuse M, Shibata C, Uchiyama T. Neuromodulation for the Treatment of Lower Urinary Tract. *Low Urin Tract Symptoms* 2015;7:121–32.
46. Tracey JM, Stoffel JT. Secondary and tertiary treatments for multiple sclerosis patients with urinary symptoms. *Investig Clin Urol.* 2016;57:377-383.



47. Silva Ferreira AP, de Souza Pegorare ABG, Miotto Junior A, Salgado PR, Medola FO, Christofolletti G. A Controlled Clinical Trial on the Effects of Exercise on Lower Urinary Tract Symptoms in Women With Multiple Sclerosis. *Am J Phys Med Rehabil.* 2019;98:777-782.
48. Andersson KE, Appel R, Cardozo L, Chapple C, Drutz H, Fourcroy J, *et al.* Pharmacological treatment of urinary incontinence. ICS; 2005 [Internet]. Available from: [https://www.ics.org/Publications/ICI\\_3/v2.pdf/chap14.pdf](https://www.ics.org/Publications/ICI_3/v2.pdf/chap14.pdf) [cited 2022, Jan 24].
