# Supplementary material
Source: PubMed Central journal article supplement (PMC9980558)
Supplement: Supplementary_Digital_Material3.pdf [file Supplementary_Digital_Material3.pdf]

|                                                              |                            |                          |                         |                  |                                                                                                             |                                              |                           |           |
|--------------------------------------------------------------|----------------------------|--------------------------|-------------------------|------------------|-------------------------------------------------------------------------------------------------------------|----------------------------------------------|---------------------------|-----------|
| McClurg, Lowe-Stronge 2008                                   | +                          | +                        | +                       | +                | +                                                                                                           | +                                            | +                         | Low risk  |
| McClurg 2009                                                 | -                          | -                        | -                       | -                | -                                                                                                           | -                                            | +                         | High risk |
| Rafii 2017                                                   | -                          | -                        | +                       | +                | +                                                                                                           | +                                            | +                         | Low risk  |
| Vahtera 1997                                                 | +                          | +                        | /                       | /                | +                                                                                                           | +                                            | +                         | Low risk  |
| Zecca, Digesu, Robshaw, Puccini 2014                         | -                          | -                        | -                       | -                | +                                                                                                           | +                                            | +                         | High risk |
| Zecca, Digesu, Robshaw, Sing 2014                            | -                          | -                        | -                       | -                | +                                                                                                           | +                                            | +                         | High risk |
| Quality assessment                                           |                            |                          |                         |                  | Summary of findings                                                                                         |                                              | Quality of Evidence GRADE |           |
| N. of studies                                                | Limitations                | Inconsistency            | Indirectness            | Publication bias | Characteristics of                                                                                          | IRR (95% CI)                                 | High                      |           |
| 21 studies of systematic review, 6 studies for meta-analysis | No significant limitations | No serious inconsistency | No serious indirectness | Unlikely         | Population: Adults<br>Intervention: Psychiatrist Therapy<br>Comparison: Control<br>Outcomes: Improvement of | Fixed and Random effects model: Tables IV-VI |                           |           |

|  |  |  |  |  |                            |  |  |
|--|--|--|--|--|----------------------------|--|--|
|  |  |  |  |  | Bladder<br>Dysfuncti<br>on |  |  |
|--|--|--|--|--|----------------------------|--|--|

+ indicates reporting in full with low risk of bias; / indicates partial reporting with unclear risk of bias; - indicated no reporting with high risk of bias.

## References

1. European Multiple Sclerosis Platform: Recommendations on rehabilitation services for persons with multiple sclerosis in Europe. Brussels: EMSP; 2004.
2. Amarenco G, de Sèze M, Ruffion A, Sheikh I. Clinical and urodynamic evaluations of urinary disorders in multiple sclerosis. *Ann Phys Rehabil Med* 2014;57:277-87.
3. Al Dandan HB, Coote S, McClurg D. Prevalence of Lower Urinary Tract Symptoms in People with Multiple Sclerosis: A Systematic Review and Meta-analysis. *Int J MS Care*. 2020;22:91-99.
4. de Sèze M, Ruffion A, Denys P, Joseph PA, Perrouin-Verbe B. The neurogenic bladder in multiple sclerosis: review of the literature and proposal of management guidelines. *Mult Scler*. 2007;13:915-28.
5. Lúcio AC, Perissinoto MC, Natalin RA, Prudente A, Damasceno BP, D'ancona CA. A comparative study of pelvic floor muscle training in women with multiple sclerosis: its impact on lower urinary tract symptoms and quality of life. *Clinics (Sao Paulo)*. 2011;66:1563-8.
6. Gallien P, Gich J, Sánchez-Dalmau BF, Feneberg W. Multidisciplinary management of multiple sclerosis symptoms. *Eur Neurol*. 2014;72:20-5.
7. Di Benedetto P, Finazzi-Agrò E. Conservative management of adult neurogenic lower urinary tract dysfunction. *EJPRM* 2017;53:981-90.
8. Shamseer L, Moher D, Clarke M, Ghersi D, Liberati A, Petticrew M, *et al*. Preferred reporting items for systematic review and meta-analysis protocols (PRISMA-P) 2015: elaboration and explanation. *BMJ*. 2015;2;350:7647.
9. Stroup DF, Berlin JA, Morton SC, Olkin I, Williamson GD, Rennie D, *et al*. Meta-analysis of observational studies in epidemiology: a proposal for reporting. Meta-analysis of observational studies in epidemiology (MOOSE) group. *JAMA*. 2000; 283:2008–12.
10. Methley AM, Campbell S, Chew-Graham C, McNally R, Cheraghi-Sohi S. PICO, PICOS and SPIDER: a comparison study of specificity and sensitivity in three search tools for qualitative systematic reviews. *BMC Health Serv Res*. 2014;14:579.
11. Higgins JPT, Green S. *Cochrane handbook for systematic reviews of interventions*. Oxford: Cochrane Collaboration; 2008.
12. Guyatt G, Oxman AD, Akl EA, Kunz R, Vist G, Brozek J, *et al*. GRADE guidelines: 1. Introduction-GRADE evidence profiles and summary of findings tables. *J Clin Epidemiol*. 2011;64:383-94.

13. Guyatt GH, Oxman AD, Kunz R, Brozek J, Alonso-Coello P, Rind D, *et al.* GRADE guidelines 6. Rating the quality of evidence--imprecision. *J Clin Epidemiol.* 2011;64:1283-93.
14. Guyatt GH, Oxman AD, Vist G, Kunz R, Brozek J, Alonso-Coello P, *et al.* GRADE guidelines: 4. Rating the quality of evidence--study limitations (risk of bias). *J Clin Epidemiol.* 2011;64:407-15.
15. Guyatt GH, Oxman AD, Montori V, Vist G, Kunz R, Brozek J, *et al.* GRADE guidelines: 5. Rating the quality of evidence--publication bias. *J Clin Epidemiol.* 2011;64:1277-82.
16. Guyatt GH, Oxman AD, Kunz R, Woodcock J, Brozek J, Helfand M, *et al.* GRADE Working Group. GRADE guidelines: 8. Rating the quality of evidence--indirectness. *J Clin Epidemiol.* 2011;64:1303-10.
17. Huedo-Medina TB, Sánchez-Meca J, Marín-Martínez F, Botella J. Assessing heterogeneity in meta-analysis: Q statistic or I<sup>2</sup> index? *Psychol Methods.* 2006;11:193-206.
18. DerSimonian R, Kacker R. Random-effects model for meta-analysis of clinical trials: an update. *Contemp Clin Trials.* 2007;28:105-14.
19. Higgins JP, Altman DG, Gøtzsche PC, Jüni P. The Cochrane Collaboration's tool for assessing risk of bias in randomised trials. *Br. Med. J.* 2011; 343: 889–893.
20. Canbaz Kabay S, Kabay S, Mestan E, Cetiner M, Ayas S. Long term sustained therapeutic effects of percutaneous posterior tibial nerve overactive bladder in multiple sclerosis patients: 12-months results. *Neurourol Urodyn.* 2017;36:104-110.
21. Gobbi C, Digesu GA, Khullar V, El Neil S, Caccia G, Zecca C. Percutaneous posterior tibial nerve stimulation as an effective treatment of refractory lower urinary tract symptoms in patients with multiple sclerosis: preliminary data from a multicentre, prospective, open label trial. *Mult Scler* 2011;17:1514-9.
22. Kabay SC, Yucel M, Kabay S. Acute effect of posterior tibial nerve stimulation on neurogenic detrusor overactivity in patients with multiple sclerosis: urodynamic study. *Urology.* 2008; 71:641-5.
23. Kabay S, Kabay SC, Yucel M, Ozden H, Yilmaz Z, Aras O, *et al.* The clinical and urodynamic results of a 3-month percutaneous posterior tibial nerve stimulation treatment in patients with multiple sclerosis-related neurogenic bladder dysfunction. *Neurourol Urodyn.* 2009;28(8):964-8.

24. Zecca C, Digesu GA, Robshaw P, Puccini F, Khullar V, Tubaro A, *et al.* Motor and sensory responses after percutaneous tibial nerve stimulation in multiple sclerosis patients with lower urinary tract symptoms treated in daily practice. *Eur J Neurol.* 2014;21:506-11.
25. Lúcio AC, Campos RM, Perissinotto MC, Miyaoka R, Damasceno BP, D'ancona CA. Pelvic floor muscle training in the treatment of lower urinary tract dysfunction in women with multiple sclerosis. *Neurourol Urodyn.* 2010;29:1410-3.
26. Lúcio A, D'ancona CA, Perissinotto MC, McLean L, Damasceno BP, de Moraes Lopes MH. Pelvic Floor Muscle Training With and Without Electrical Stimulation in the Treatment of Lower Urinary Tract Symptoms in Women With Multiple Sclerosis. *J Wound Ostomy Continence Nurs.* 2016;43:414-9.
27. de Sèze M, Raibaut P, Gallien P, Even-Schneider A, Denys P, Bonniaud V, *et al.* Transcutaneous posterior tibial nerve stimulation for treatment of the overactive bladder syndrome in multiple sclerosis: results of a multicenter prospective study. *Neurourol Urodyn.* 2011;30:306-11.
28. Rafii F, Sajjadi M, Shareinia H, Sarraf P. Pelvic Floor Muscle Training Instruction to Control Urinary Incontinence and its Resulting Stress, Anxiety and Depression in Patients with Multiple Sclerosis. *Jundishapur J Chronic Dis Care.* 2017; 6:37333.
29. Fjorback MV, van Rey FS, van der Pal F, Rijkhoff NJ, Petersen T, Heesakkers JP. Acute urodynamic effects of posterior tibial nerve stimulation on neurogenic detrusor overactivity in patients with MS. *European Urol* 2006;51:464-70
30. Vahtera T, Haaranen M, Viramo-Koskela AL, Ruutiainen J. Pelvic floor rehabilitation is effective in patients with multiple sclerosis. *Clin Rehabil* 1997; 11: 211–219.
31. McClurg D, Ashe RG, Lowe-Strong AS. Neuromuscular electrical stimulation and the treatment of lower urinary tract dysfunction in multiple sclerosis--a double blind, placebo controlled, randomised clinical trial. *Neurourol Urodyn.* 2008;27:231-7.
32. McClurg D, Ashe RG, Marshall K, Lowe-Strong AS. Comparison of pelvic floor muscle training, electromyography biofeedback, and neuromuscular electrical stimulation for bladder dysfunction in people with multiple sclerosis: a randomized pilot study. *Neurourol Urodyn.* 2006;25:337-48.
33. McClurg D, Lowe-Strong A, Ashe RG. The benefits of pelvic floor muscle training in people with multiple sclerosis and lower urinary tract dysfunction. *Neurourology and Urodynamics* 2008;27:231–237 .

34. Ferreira AP, Pegorare AB, Salgado PR, Casafus FS. Impact of a pelvic floor training program among Women with Multiple Sclerosis: A Controlled Clinical Trial. *Am J Phys Med Rehabil.* 2016;95:1-8.
35. McClurg D, Lowe-Strong A, Ashe R. Pelvic floor training for lower urinary tract dysfunction in MS. *Nurs Times.* 2009;105:45-7.
36. Khan F, Pallant JF, Pallant JI, Brand C, Kilpatrick TJ. A randomised controlled trial: outcomes of bladder rehabilitation in persons with multiple sclerosis. *J Neurol Neurosurg Psychiatry.* 2010;81:1033-8.
37. Engeler DS, Meyer D, Abt D, Müller S, Schmid HP. Sacral neuromodulation for the treatment of neurogenic lower urinary tract dysfunction caused by multiple sclerosis: a single-centre prospective series. *BMC Urol.* 2015;23:15:105.
38. Zecca C, Digesu GA, Robshaw P, Singh A, Elneil S, Gobbi C. Maintenance percutaneous posterior nerve stimulation for refractory lower urinary tract symptoms in patients with multiple sclerosis: an open label, multicenter, prospective study. *J Urol.* 2014;191:697-702.
39. Pereira CMA, Castiglione M, Kasawara KT. Effects of physiotherapy treatment for urinary incontinence in patient with multiple sclerosis. *J Phys Ther Sci.* 2017;29:1259-1263.
40. Lúcio AC, D'Ancona CA, Lopes MH, Perissinotto MC, Damasceno BP. The effect of pelvic floor muscle training alone or in combination with electrostimulation in the treatment of sexual dysfunction in women with multiple sclerosis. *Mult Scler.* 2014;20:1761-8.
41. Roe B, Williams K, Palmer M. Bladder training for urinary incontinence in adults. *Cochrane Database Syst Rev* 2000;1308.
42. Subak LL, Quesenberry CP, Posner SF, Cattolica E, Soghikian K. The effect of behavioural therapy on urinary incontinence: a randomized controlled trial. *Obstet Gynecol* 2002; 100: 72–78.
43. Eustice S, Roe B, Paterson J. Prompted voiding for the management of urinary incontinence in adults (Cochrane Review). *Cochrane Database Syst Rev* 2000;(2):2113.
44. Shafik A, Shafik IA. Overactive bladder inhibition in response to pelvic floor muscle exercises. *World J Urol.* 2003;20:374-7.
45. Yamanishi T, Kaga K, Fuse M, Shibata C, Uchiyama T. Neuromodulation for the Treatment of Lower Urinary Tract. *Low Urin Tract Symptoms* 2015;7:121–32.

46. Tracey JM, Stoffel JT. Secondary and tertiary treatments for multiple sclerosis patients with urinary symptoms. *Investig Clin Urol.* 2016;57:377-383.
47. Silva Ferreira AP, de Souza Pegorare ABG, Miotto Junior A, Salgado PR, Medola FO, Christofolletti G. A Controlled Clinical Trial on the Effects of Exercise on Lower Urinary Tract Symptoms in Women With Multiple Sclerosis. *Am J Phys Med Rehabil.* 2019;98:777-782.
48. Andersson KE, Appel R, Cardozo L, Chapple C, Drutz H, Fourcroy J, *et al.* Pharmacological treatment of urinary incontinence. *ICS; 2005* [Internet]. Available from: [https://www.ics.org/Publications/ICI\\_3/v2.pdf/chap14.pdf](https://www.ics.org/Publications/ICI_3/v2.pdf/chap14.pdf) [cited 2022, Jan 24].
